# Supplementary material
Source: Research Square preprint supplement (doi:10.21203/rs.3.rs-9360178/v1)
Supplement: Supplementary file 1 [file ec2127ca8ad2daa641a69950.docx]

**Supplementary Material**

**Supplementary Figures**

**Supplementary Figure 1. *ALK* FISH analysis in *STRN::ALK*-positive tumors.**

**
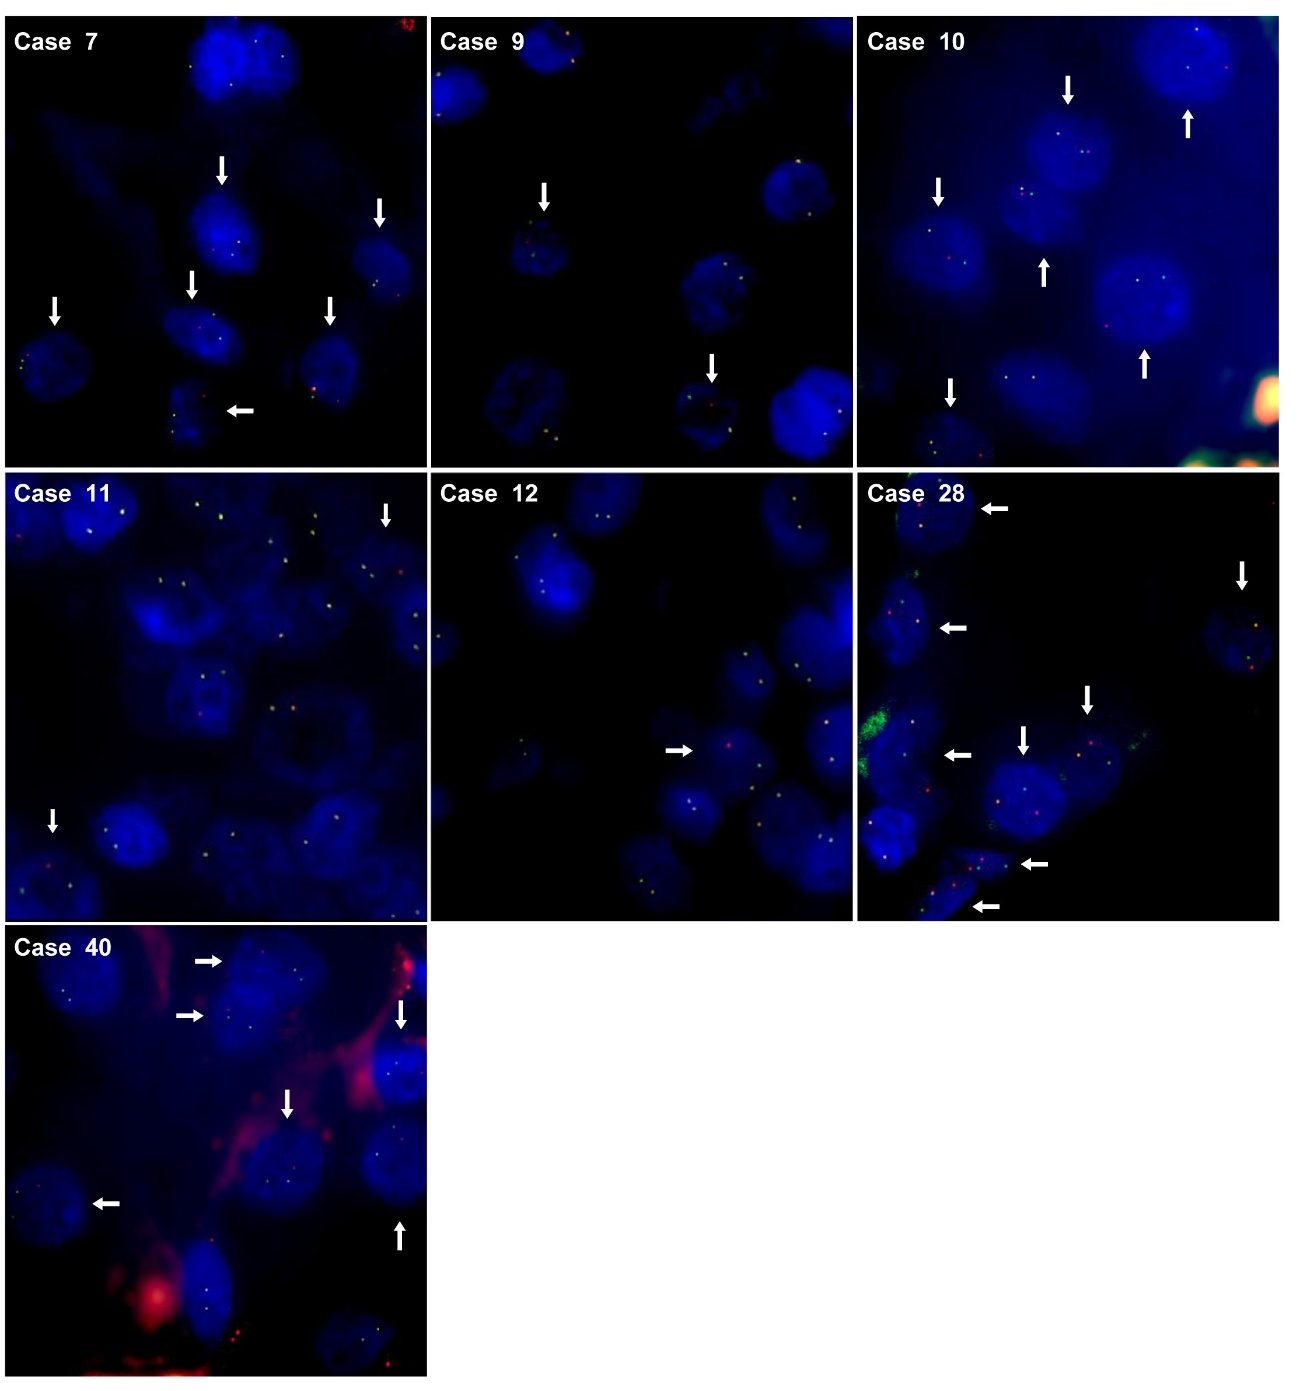
**

Representative dual-color break-apart FISH images for all *STRN::ALK*-positive tumors included in this study. Each panel shows tumor nuclei with split red and green signals indicating *ALK* rearrangement and fused yellow signals corresponding to intact alleles. Case 10 harbors the canonical *STRN::ALK* fusion, whereas Cases 7, 9, 11, 12, 28, and 40 correspond to out-of-frame variants.

**Supplementary Figure 2. ALK immunohistochemistry in *STRN::ALK*-positive tumors** **(original magnification ×200).**


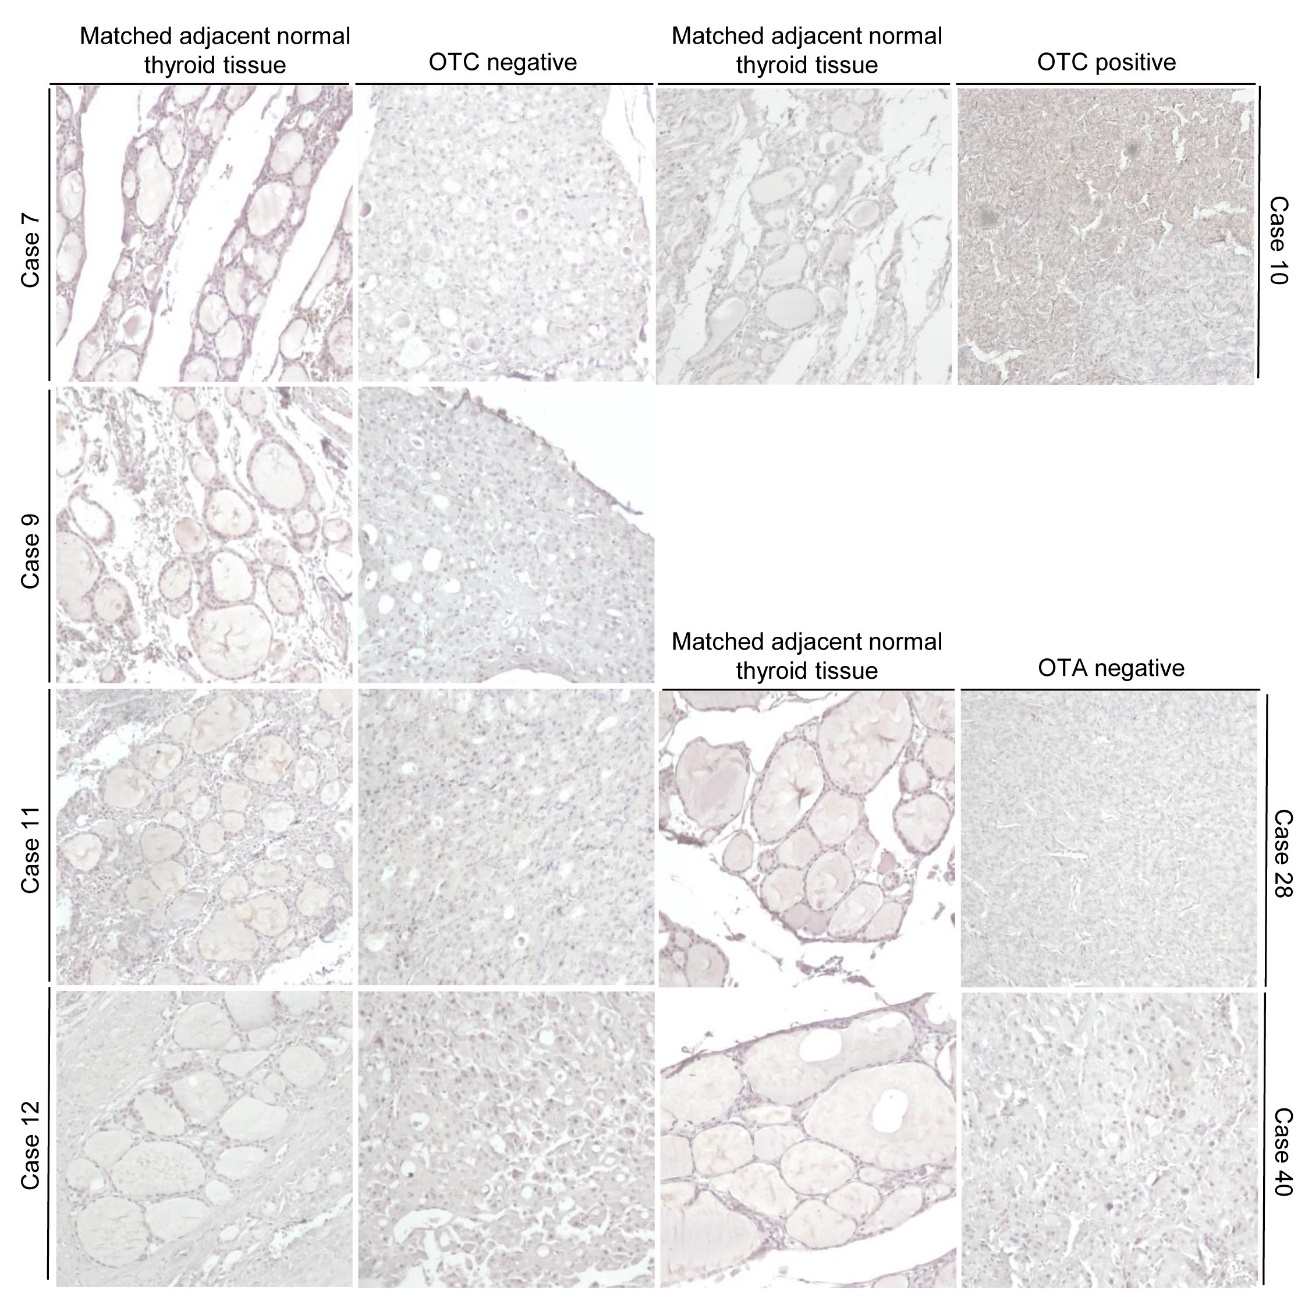


Representative ALK immunohistochemistry images for all *STRN::ALK*-positive tumors. Positive cytoplasmic staining is observed exclusively in the canonical fusion (Case 10), whereas out-of-frame variants (Cases 7, 9, 11, 12, 28, and 40) show no detectable ALK expression. Adjacent normal thyroid tissue is negative in all cases.

**Supplementary Tables**

**Supplementary Table 1. Physicochemical properties of predicted *STRN::ALK* protein variants.**

|  | Canonical | Type I | Type II |
| --- | --- | --- | --- |
| Number of amino acids | 700 | 685 | 145 |
| Molecular weight | 77524.51 | 75651.35 | 15951.02 |
| Theoretical pI | 7.87 | 7.23 | 9.17 |
| Total number of negatively charged residues (Asp + Glu) | 78 | 77 | 17 |
| Total number of positively charged residues (Arg + Lys) | 80 | 77 | 21 |
| Formula | C3441H5396N962O1014S33 | C3357H5267N937O992S32 | C702H1103N213O206S4 |
| Total number of atoms | 10846 | 10585 | 2228 |
| The estimated half-life | 30 hours | 30 hours | 30 hours |
| The instability index | 49.11 | 47.53 | 29.34 |
| Aliphatic index | 73.90 | 74.53 | 70.28 |
| Grand average of hydropathicity (GRAVY) | -0.488 | -0.469 | -0.610 |
| Cases with this protein conformation | 5 and 10 | 4, 9, 11, and 12 | 7, 28, and 40 |
